# Supplementary material
Source: PubMed Central journal article supplement (PMC3051234)
Supplement: supp_tpc.110.081356_Bao_Supplemental_DataFinal.pdf [file supp_tpc.110.081356_Bao_Supplemental_DataFinal.pdf]

**Supplemental Figure 1.** The phenotypes of *flc-3*, wild type (Col-0), *skb1-1 flc-3* and *skb1-1* grown in soil for 35 days under long day

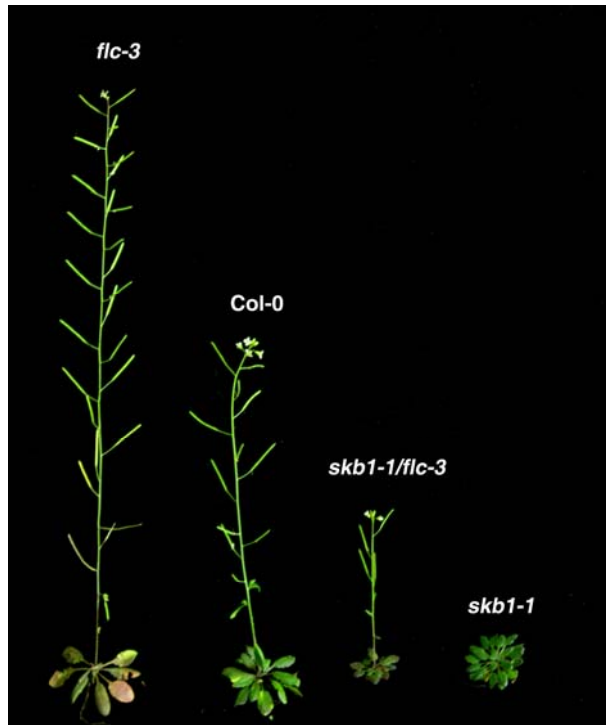

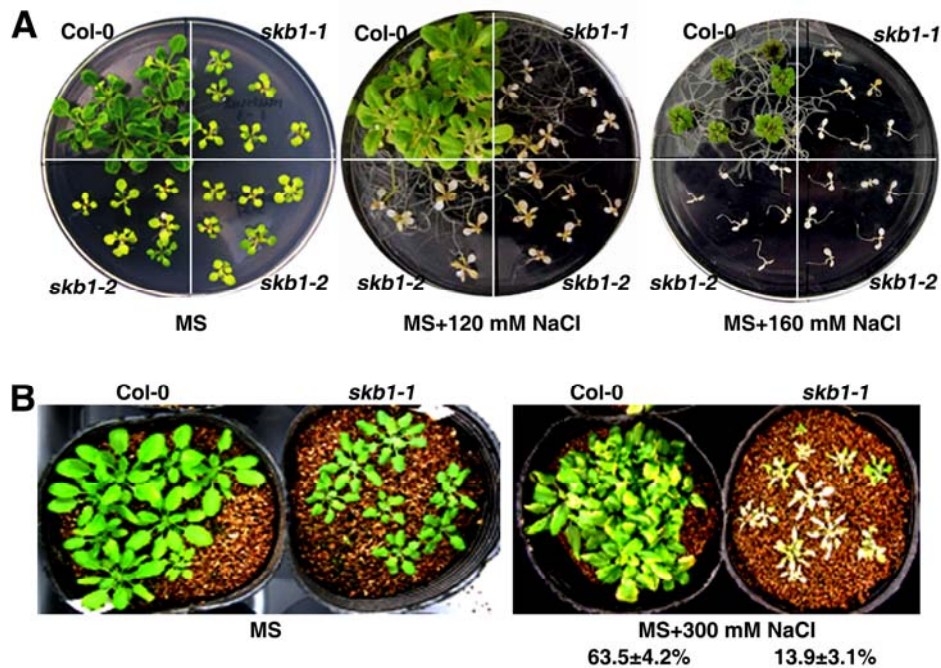

**Supplemental Figure 2.** The sensitivity of the wild type (Col-0) and *skb1* mutants to salt stress. (A) *skb1-1* and *skb1-2* mutants were all hypersensitive to salt stress. Four-day-old seedlings were transferred from MS medium alone to MS medium with 0, 120 or 160 mM NaCl. Photographs were taken at 20 days (MS) or 40 days (120 and 160 mM NaCl) after seedling transfer to the treatment medium. (B) Three-week-old Col-0 and *skb1-1* plants were grown in soil without NaCl (left) or with 300 mM NaCl every three days for two additional weeks (right). The survival rate (bottom) was measured at the end of NaCl treatment and is the means  $\pm$  SE of two independent experimental results (n=40).

**Supplemental Figure 3.** Overexpression of SKB1 slightly increases the tolerance to salt stress

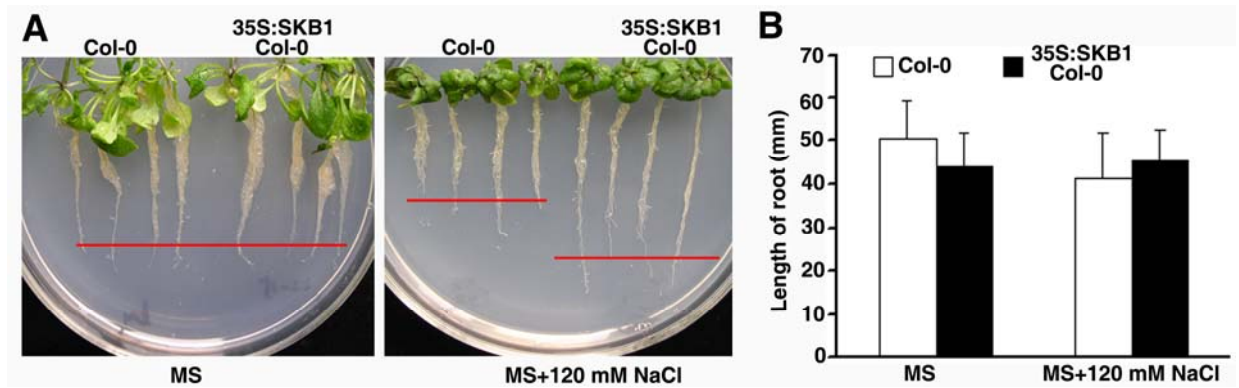

**Supplemental Figure 3.** Overexpression of SKB1 in a Col-0 background slightly increases tolerance to salt stress. (A) Four-day-old seedlings were transferred from MS medium to MS medium with 0 or 120 mM NaCl and grown horizontally for 30 days. Representative plants were selected for photographs and laid vertically to observe root length. The red line indicate the root length of Col-0 and 35S:SKB1 Col-0. (B) More than 20 roots were measured to score the root length shown in A. The quantitative results represent the mean  $\pm$  SE of two independent experiment results.

**Supplemental Figure 4.** The phenotypes of flowering time-controlling gene mutants grown on medium with salt.

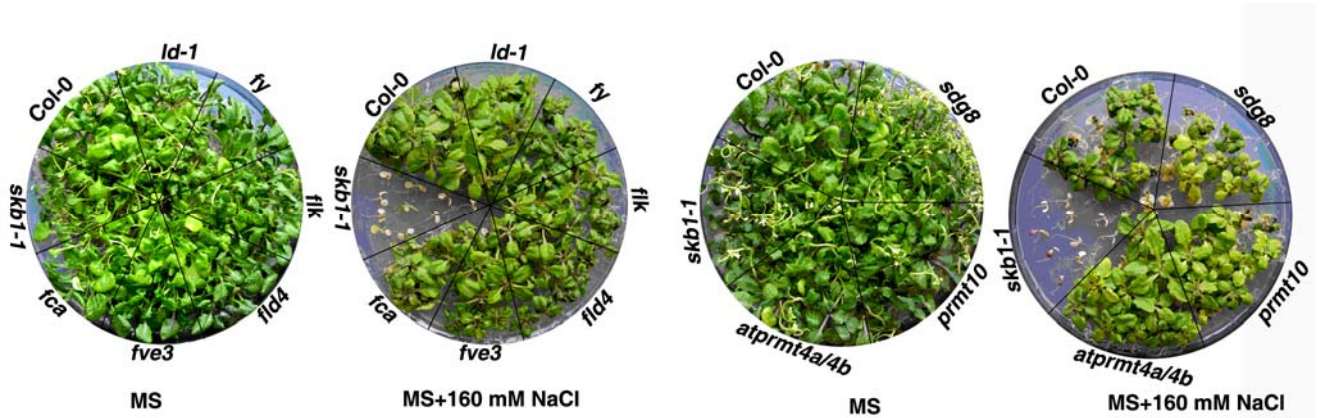

**Supplemental Figure 4.** The phenotypes of flowering time-controlling gene mutants, including *skb1-1*, *fca*, *fve*, *fld4*, *flk*, *fy*, *ld-1*, *prmt4a prmt4b*, *prmt10* and *sdg8*, grown on MS medium with salt. Four-day-old seedlings were transferred from MS medium to MS medium with 0 or 160 mM NaCl. Photographs were taken 30 days after seedling transfer to the treatment medium.

**Supplemental Figure 5.** Growth of plants on MS medium containing different concentrations of ABA.

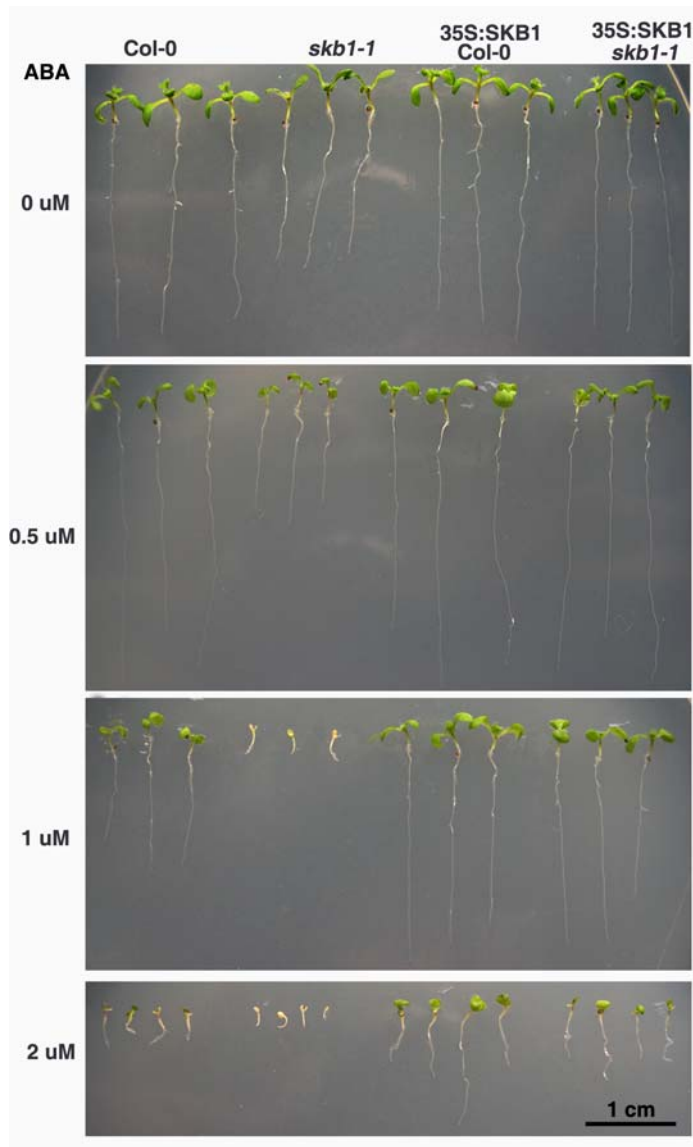

**Supplemental Figure 5.** Growth of Col-0, *skb1-1*, 35S:SKB1 Col-0 and 35S:SKB1 *skb1-1* on MS medium containing 0, 0.5, 1 or 2 μM ABA. Seeds were germinated for 9 days on MS medium with or without ABA, and representative plants are shown.

Supplemental Figure 6. Anti-SKB1 and -H4R3sme2 antibodies could not pull down chromatin DNA in *skb1-1* mutant. Zhang et al. (2017). *Plant Cell* 0057:1108-1128

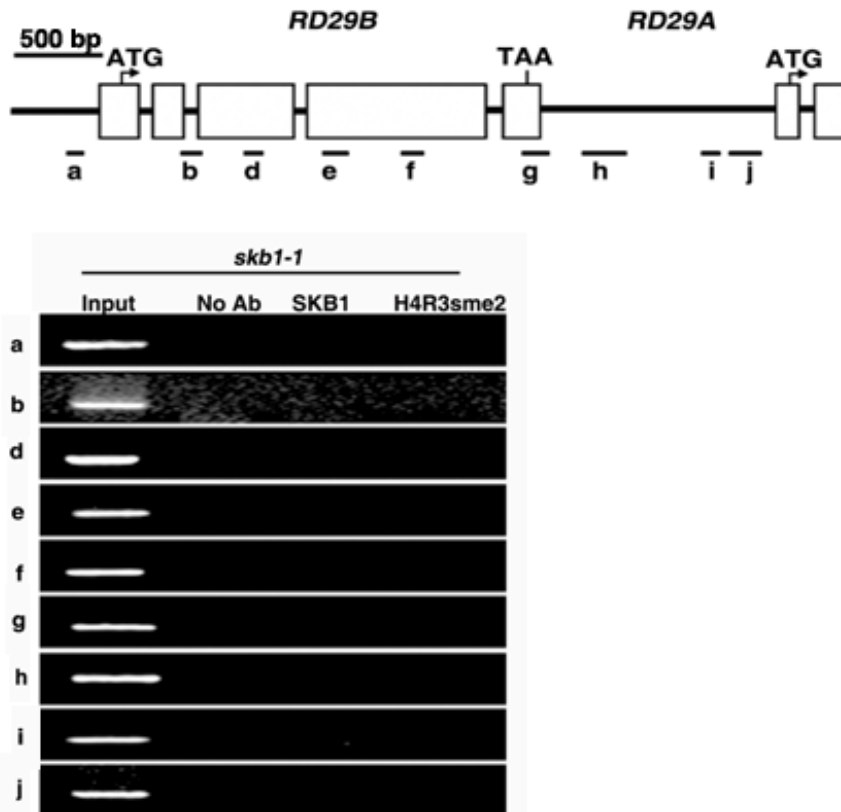

**Supplemental Figure 6.** Anti-SKB1 and -H4R3sme2 antibodies could not pull down chromatin DNA in *skb1-1* mutant. In the upper *RD29B* and *RD29A* genes structure, white boxes represent exons or 5' or 3' untranslated regions, and black lines represent introns.

**Supplemental Figure 7.** Sequence alignment of LSM4 homologs in Arabidopsis, human, mouse, and yeast.

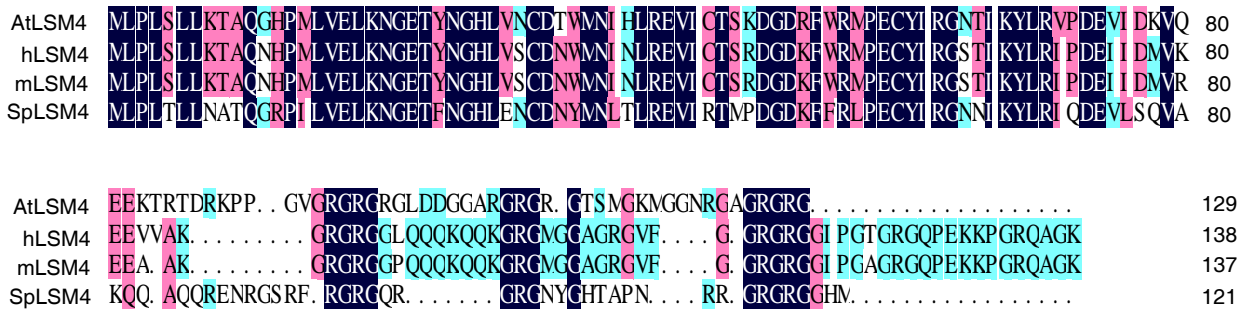

**Supplemental Figure 7.** Sequence alignment of LSM4 homologs in *Arabidopsis*, human, mouse, and yeast. Sequence alignment of LSM4 homologs in Arabidopsis (AtLSM4: NP\_NP\_198124.1 ), human (hLSM4: NP\_036453.1), mouse (mLSM4: NP\_056631.1) and yeast (SpLSM4: NP\_596279.1).



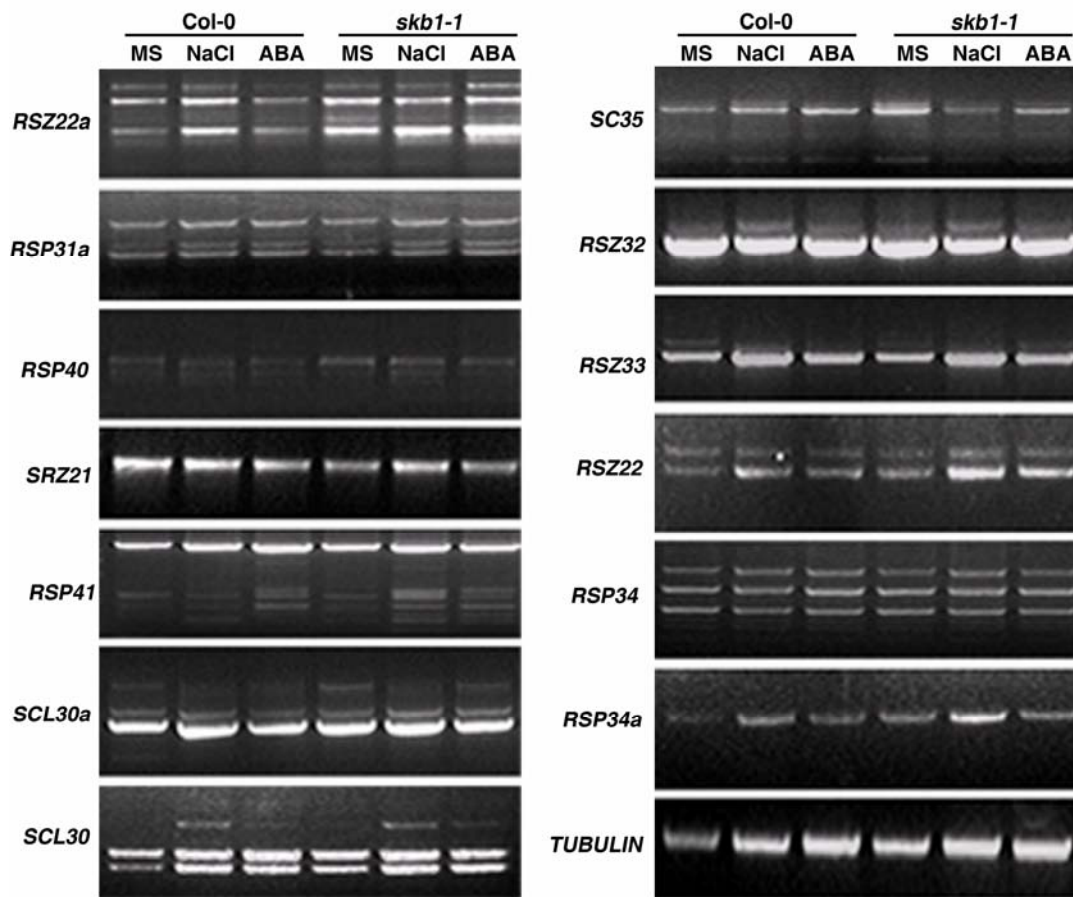

**Supplemental Figure 8.** RT-PCR analysis of the splice variants serine/arginine rich proteins encoding genes. Template RNA isolated from 11-day-old seedlings grown on MS medium was treated with 200 mM NaCl for 6 h or 100  $\mu$ M ABA for 3 h. The experiment was performed independently three times with similar results. *TUBULIN* was the loading control.



**Table SI:** Primers for real-time quantitative, quantitative RT-PCR, gene cloning and verification of SALK T-DNA insertion mutants. Supplemental Data. Zhang et al. (2011). Plant Cell 10.1105/tpc.110.081356

| <b>Quantitative RT-PCR primers</b>   |                           |                           |
|--------------------------------------|---------------------------|---------------------------|
| Gene names                           | Forward primer            | Reverse primer            |
| <i>RD29A</i>                         | CGGTGGGAGATCAAACCTCAA     | AACTTCGTCGTCACGGCAGA      |
| <i>RD29B</i>                         | GAAACATCGGACTGGGAAGC      | CACAGGAGTGTTCAATGGCTCT    |
| <i>RD24</i>                          | TGGCGTCGCAGTCCACA         | CCAACGTAAATCGGTCTTCC      |
| <i>COR47</i>                         | AAGTGAAACCTCAAGAGACAACGA  | CAGCTAACTCCGGTTCAGAGATC   |
| <i>DREB2A</i>                        | TCAGAGGAGTTAGGCAAAGGATT   | TCAGCCGCCGCCTTTT          |
| <i>ABF3</i>                          | GAATTCCGCAGAGGCAACA       | CCAGCCCTGACCAAAAACCTC     |
| <i>ABI1</i>                          | TGGCAAGGAAGCGGATTCT       | CGCGAGCAACGATGCAT         |
| <i>HAB1</i>                          | CTTGGTTTGTCTCATCATATAGTAG | TGGCTTCTTTGCCACGGAA       |
| <i>MRK1</i>                          | CGATACTTCAGGCAGATAC       | AGGACGCTGCTAGTAGAG        |
| <i>MEK1</i>                          | CTTATGCCCTAATCCCATCTGT    | ACAGAGACACGGTCTGGAT       |
| <i>MEK1</i>                          | CTTACCATCCGTGGGTTC        | TGTGTCGAAGAATCATGTCTCGT   |
| <i>At1G17170</i>                     | AGTATGTTTGGGATGAGGACAAG   | CATCTCGAGGAGCAAGGAG       |
| <i>At5G17460</i>                     | ATGTTTCGCGGAAGACTCTC      | CACTTGCATAAAATCGAGTTGCTTG |
| <b>ChIP quantitative PCR primers</b> |                           |                           |
| Primer names                         | Forward primer            | Reverse primer            |
| <i>RD29-a</i>                        | ccaataaacgtggaccgact      | ctctctacgtggctatgcca      |
| <i>RD29-b</i>                        | GCGCACCCAGgtaatttctc      | TCACGGCAGAGGATTCATAC      |
| <i>RD29-d</i>                        | CCGACTCATTATCCTCTCGG      | CACGTCCTCTGTTGCTGAAA      |
| <i>RD29-e</i>                        | AAGACAAGGACGCGAAGAAG      | TCACATCACCTCTTGTGCGGA     |
| <i>RD29-f</i>                        | ACTGCTTACGGGCAGAAAGT      | TTCACTCCACTTCCACCTCC      |
| <i>RD29-g</i>                        | GGGAACTGAagatttggggt      | aatgggccgctaaaagagtt      |
| <i>RD29-h</i>                        | tgtgacatttagacctatcgga    | tcctccatcaaatcatgct       |
| <i>RD29-i</i>                        | ttcgttctgacatcattcaatt    | aaacggcacatccttctcat      |
| <i>RD29-j</i>                        | gccaatagacatggaCCGAC      | TTGCTCTCTACGCGTGTCTG      |
| <i>FLC-1</i>                         | ggcacagctccgagtgta        | atggagccacacaaacatttc     |
| <i>FLC-2</i>                         | ttgcatatgtgtggacatt       | cactgcctactgctcaaaa       |
| <i>HAB1-1</i>                        | ggctgtcgtctccatcttt       | tcagtgttaatggaatcgtctt    |
| <i>HAB1-2</i>                        | aaaaaggaaagaaagaatcaa     | ttttaaggtcgtctcaggca      |
| <i>HAB1-3</i>                        | tttcaatcggaagattttgc      | agaacatgggttcttggat       |
| <i>HAB1-4</i>                        | AGAAGCGGGTCTTCCAATGT      | ATAATCGCGGTTGCAAGAAC      |
| <i>HAB1-5</i>                        | AGCAGGTGCAGTGGGATAAAG     | TACGGTCTCAGACGCAACAG      |
| <i>HAB1-6</i>                        | AGGTCCATCGgtaagcattg      | gaggaggaaagaaccggag       |

**Gene cloning primers**

| Gene names                             | Forward primer                         | Reverse primer                       |
|----------------------------------------|----------------------------------------|--------------------------------------|
| <i>At1g65700</i><br>( <i>LSM8</i> )    | GGAATTCATGGCGGCAACTACTGGAC<br>TTG      | CCCTCGAGTCAATGCACTACGGGTT<br>TCAACG  |
| <i>At3g11500</i><br>( <i>SMG-B</i> )   | GGAATTCATGAGTCGATCAGGTCAGC<br>CTC      | CCCTCGAGCTAAGATCTTCCAACGT<br>GTTCG   |
| <i>At2g43810</i><br>( <i>LSM6-B</i> )  | GGAATTCATGAGTGGAGTTGGAGAGA<br>AAGC     | CCCTCGAGCTATGCTCCATCTGACA<br>ATGTCC  |
| <i>AT2g03870</i><br>( <i>LSM7</i> )    | GGAATTCATGTCTGGAAGAAAAGAAA<br>CGG      | CCCTCGAGTTAGACAGCCTCTGCAG<br>TAAC    |
| <i>At2g18740</i><br>( <i>SME-B</i> )   | GGAATTCATGGCGAGCACCAAAGTTC<br>AAAG     | CCCTCGAGTCACTTCCCGTGTTC<br>TCATCAG   |
| <i>At4g30330</i><br>( <i>SME-A</i> )   | GGAATTCATGGCGAGCACCAAAGTTC             | CCCTCGAGTCACTTGCCCGGTTC<br>TCATG     |
| <i>At5g27720</i><br>( <i>LSM4</i> )    | GGAATTCATGCTTCCTCTATCGCTGCT<br>TAAACTG | CCCTCGAGTCAACCACGGCCGCGA<br>C        |
| <i>At5g27720</i><br>( <i>LSM4-d1</i> ) | GGAATTCATGCTTCCTCTATCGCTGCT<br>TAAACTG | CCCTCGAGTCTGTTGCCACCCATCT<br>TCC     |
| <i>At5g27720</i><br>( <i>LSM4-d2</i> ) | GGAATTCATGCTTCCTCTATCGCTGCT<br>TAAACTG | CCCTCGAGTCCATCATCCACAC<br>CAC        |
| <i>At5g27720</i><br>( <i>LSM4-d3</i> ) | GGAATTCATGCTTCCTCTATCGCTGCT<br>TAAACTG | CCCTCGAGTCCAACACCTGGTGGTT<br>TTCTATC |

**quantitative RT-PCR primers**

| Gene names    | Forward primer                  | Reverse primer                  |
|---------------|---------------------------------|---------------------------------|
| <i>SKB1</i>   | TGGTAAAGATGGAAGGATGGGAAGAC<br>G | GGTGTGCTGTTGTAGGCTCGATCC        |
| <i>RD22</i>   | ATGGCGATTCTCCTCTGATCT           | CTAGTAGCTGAACCACACAACATG<br>AG  |
| <i>SRP34</i>  | ATGAGCAGTCGTTTCGAGTAG           | TTACCTCGATGGACTCCTAG            |
| <i>SRP34A</i> | ATGAGTGGGCGATTTTCTCGG           | TCACACACTGCCTTCGCG              |
| <i>RSP31A</i> | AGCAAGTTCGGGAGAGTGAA            | GCCCAACAACATCTTCAACC            |
| <i>RSP40</i>  | ACTACGCCTGCCAAAATCAT            | CACCATCATACCCACCATCA            |
| <i>RSP41</i>  | GAGAGCCTCGAAGAAAGCAA            | GCGATTTGGAATGGAGTCAT            |
| <i>RSZ21</i>  | TGCAACATGACGAGGGTTTA            | AAAAGGCGCCACAGAGTAGA            |
| <i>RSZ22a</i> | AAGAGCCAAAGCCGTTTCTT            | TGCATAGTTTTTAGCAGAGCTT          |
| <i>FLC</i>    | CCCCATATGGGAAGAAAAAACTAG        | CCCGGATCCCTAATTAAGTAGTGGG<br>AG |
| <i>RSZ32</i>  | GTATCATCCGCGGTTCACTT            | TGTCCTCCACGTTTTTCTCT            |
| <i>RSZ33</i>  | GCAGTGCTCTCCTTCAATCC            | ACATGCTACAATGCCTGCAA            |
| <i>SC35</i>   | CCTTCCGTACGACTGCTGAT            | TCAACATGGTTGTGCCATCT            |
| <i>RSZ22</i>  | CCCTTGAGTGCTTTCAGCTC            | GAAACGCTTAGGCATTTAGCA           |

|                                                          |                                 |                             |
|----------------------------------------------------------|---------------------------------|-----------------------------|
| <i>SCL30</i>                                             | CTCCTCGACGTGGATATGGT            | ACCTTCATAGCCAGGGGAGT        |
| <i>SCL30a</i>                                            | TCCCCCTGTGTTTTCTTCG             | CTTTGGCTCCTTGCTTGTTTC       |
| <i>AT1G13350</i>                                         | AAGCGGCACAAGTCCCCTC             | CCCTCTCTCTACTACTATACCTGG    |
| <i>TUBULIN</i>                                           | TTTGGAGCCTGGGACTATGGAT          | ACGGGGGAATGGGATGAGAT        |
| <i>HAB1</i>                                              | CTTGGTTTGCTCATCACATATAGTAG      | CACATCAATATCCGTCTCCTTGC     |
| <i>FIP1</i>                                              | CATAGAGGACATGAAGACTTCTCTG       | TGTATCTCATCACCAGAGGATGC     |
| <i>AT1G15940</i>                                         | TCCTCTTGTCGAAGCGACTGA           | AAGCACCAGTTGAGGATGATCC      |
| <i>AT1G28060</i>                                         | ATCGTGATCGAGATTCGAGTCC          | AGCCACATCCTCAAACCTGCT       |
| <i>AT1G24160</i>                                         | GCATATCTCTATGAATCTGGATCCAC      | GAGCTTTTCGATACGGTCCGC       |
| <i>AT1G69250</i>                                         | ATCTGCCATTGAATGCAATGCCG         | TTACACGAAGCTTACGGTCTGC      |
| <i>AT1G42440</i>                                         | CTGCTTGGATTGTGGATGAAACAG        | CTTCGTCATCAGCATATGCCTC      |
| <i>CDPK13</i>                                            | GAGTTGAAAGCCGGACTTCG            | GAGATGCTCATCGTTTGCTACC      |
| <i>CBL1</i>                                              | GTGAGTGAGGTTGAAGCATTATTTGA<br>G | CCGAAATCGATGACTCCTTTTCG     |
| <i>AT1G18160</i>                                         | TGAGCTACAGCTTGAAAGCAACC         | ACTGGCAGAGTAGACAGAATCATC    |
| <i>At1g45249</i>                                         | TGTTACGCCATTGTCATCAGAAGG        | TGCTTTCGTTGTAACCTCGTCATTCTC |
| <i>At1g17550</i>                                         | GTGTATATGATGGCCACGGAG           | ACCTGGACATGGCAAGAACG        |
| <i>AT1G72050</i>                                         | GCAGCATATGCAGAGTCATTTCG         | AGCTAGCAGCACAATCATCCAC      |
| <i>AT1G49670</i>                                         | GTTGGACTAATTGCAGCAGTGG          | TGCAGTTAATCCCAGAGGTAAGC     |
| <i>CDKP2</i>                                             | GTTGGACTAATTGCAGCAGTGG          | CTCATCATTGCTGTAAACTCCGAG    |
| <i>CIPK3</i>                                             | GTTGGACTAATTGCAGCAGTGG          | AGAACCCTCAGAGACTTGAGC       |
| <i>AT1G49670</i>                                         | GTTGGACTAATTGCAGCAGTGG          | AGCCTTATCCAAGTGGAGCTGC      |
| <i>RLP4</i>                                              | GTTGGACTAATTGCAGCAGTGG          | GGTAGGAAACCTTTCAGACCTTG     |
| <b>SALK T-DNA insertion mutants verification primers</b> |                                 |                             |
| SALK number                                              | Forward primer                  | Reverse primer              |
| SALK_057540                                              | AAGTGGAGGCTGTCAGACATG           | TTCATCCCGCATGAGATAGAC       |
| SALK_007750                                              | CGAGAATCTTTATTCGAGCCC           | GAATCTCTCTTTCTCCGCC         |
| SALK_150861                                              | AAAAGCTGCTGGAAAGAGTCC           | GCTACTGCTTGAGTTTGGTGC       |
| SALK_065480                                              | CCTTCATCGCAATCGTAAATC           | TTTTGCGCTAAACTAGTTGGG       |

**Table S2. Supplemental Splicing changes (novel type) of *Arabidopsis thaliana* 081356**

| Gene locus* | Splicing event   | Alternative Splicing regions                                                                                                                            | Splicing position      |
|-------------|------------------|---------------------------------------------------------------------------------------------------------------------------------------------------------|------------------------|
| At2g43410   | IR               | 18028320-18028448                                                                                                                                       | intron 4               |
| At4g23260   | A3'S             | 12168162-12168399; 12167917-12168070; 12167917-12168017                                                                                                 | exon 6                 |
| At5g24270   | A5'S             | 8239181-8239261; 8239381-8239433; 8239352-8239433                                                                                                       | exon 6                 |
| At3g16800   | A3'S             | 5721105-5721154; 5721256-5721542; 5721274-5721542                                                                                                       | exon 2                 |
| At4g24740   | IR               | 12755783-12755931; 12756047-12756144                                                                                                                    | intron 5,6             |
| At3g20270   | A3'S             | 7067772-7068038; 7068130-7068281; 7068124-7068281                                                                                                       | exon 3                 |
| At3g25840   | A5'S             | 9451861-9452032; 9452135-9452183; 9452110-9452183                                                                                                       | exon 14                |
| At3g01150   | IR               | 51915-52154                                                                                                                                             | intron 1               |
| At1g54360   | A5'S             | 20291458-20291595; 20291302-20291378; 20291302-20291357                                                                                                 | exon 5                 |
| At5g57630   | IR               | 23342391-23342488                                                                                                                                       | intron 3               |
| At2g15530   | A5'S             | 6774084-6775826; 6773917-6773964; 6773917-6773983                                                                                                       | exon 2                 |
| At1g53650   | A3'S             | 20029591-20029659; 20030962-20031447; 20029405-20029466; 20030554-20030667; 20029405-20029462; 20030554-20030665                                        | exon 9<br>exon 2       |
| At4g38510   | A5'S             | 18014735-18014796; 18014903-18014975; 18014884-18014975; 1679826-1679886; 1679826-1679909                                                               | exon 2                 |
| At2g04790   | A3'S             | 1679516-1679719; 1679521-1679719; 1679528-1679719<br>1679805-1679886; 1679805-1679909; 1679805-1679886                                                  | exon 2                 |
| At5g18620   | A3'S             | 6197403-6197461; 6197152-6197317; 6197152-6197297                                                                                                       | exon 21                |
| At2g39730   | A3'S             | 16571180-16571472; 16570746-16571066; 16570746-16571060                                                                                                 | exon 7                 |
| At1g72650   | A3'S             | 27351194-27351246; 27350924-27351246                                                                                                                    | exon 4                 |
| At3g12250   | A5'S             | 3906244-3906525; 3906451-3906525; 3906244-3906416; 3906451-3906416                                                                                      | exon 3                 |
| At3g23900   | A3'S             | 8634745-8635182; 8634109-8634616; 8634109-8634305                                                                                                       | exon 3                 |
| At3g29160   | A3'S             | 11129883-11129966; 11131004-11131188; 11129659-11129799; 11130727-11130909; 11129659-11129794; 11130727-11130893                                        | exon 9<br>exon 4       |
| At2g33480   | IR / A3'S / A5'S | 14181790-14181878; 14181536-14181789; 14181879-14182402; 14181908-14182402                                                                              | intron 2<br>exons 2, 3 |
| At3g62190   | IR               | 23022260-23022334                                                                                                                                       | intron 4               |
| At4g31720   | IR               | 15355516-15355611                                                                                                                                       | intron 2               |
| At1g60850   | A3'S             | 22400285-22400362; 22400021-22400178; 22400021-22400167                                                                                                 | exon 2                 |
| At3g12570   | ES / IR          | 3988714-3988823; 3989180-3989266; 3989386-3991079; 3989267-3989385; 3989267-3989356                                                                     | exon 2<br>intron 2     |
| At4g12790   | ES/A3'S/<br>A5'S | 7518643-7518751; 7518848-7518955; 7519326-7519422; 7518848-7518926; 7519326-7519396; 7518848-7518924; 7519326-7519397; 7519173-7519422; 7518848-7519081 | exon 2<br>exons 2, 1   |

Note: \* A comparison of our RNA deep sequence results and data in the Sanchez, *et al.* (Sanchez et al., 2010) paper (Supplementary Table 4). Splicing defects of Genes shown here exist in both datasets.

IR: intron retention; A5'S: alternative 5' splicing; A3'S: alternative 3' splicing; ES: exon skipping.
